# Supplementary material for: The United States’ contribution of plastic waste to land and ocean
Source: PubMed Central journal article supplement (PMC7608798; doi:10.1126/sciadv.abd0288), 2020-10-30
Supplement: abd0288_SM.pdf [file abd0288_SM.pdf]

## Supplementary Materials for

### **The United States' contribution of plastic waste to land and ocean**

Kara Lavender Law\*, Natalie Starr, Theodore R. Siegler, Jenna R. Jambeck, Nicholas J. Mallos, George H. Leonard

\*Corresponding author. Email: [klavender@sea.edu](mailto:klavender@sea.edu)

Published 30 October 2020, *Sci. Adv.* **6**, eabd0288 (2020)

DOI: [10.1126/sciadv.abd0288](https://doi.org/10.1126/sciadv.abd0288)

#### **The PDF file includes:**

Supplementary Text  
Tables S1 to S5  
Legend for table S6  
Legend for data S1  
References

#### **Other Supplementary Material for this manuscript includes the following:**

(available at [advances.sciencemag.org/cgi/content/full/6/44/eabd0288/DC1](https://advances.sciencemag.org/cgi/content/full/6/44/eabd0288/DC1))

Table S6  
Data S1

## Supplementary Text

We calculated the proportion of mismanaged waste in the 50 countries with the highest plastic waste generation by total population in 2016 (see Materials and Methods section) and assessed changes in this proportion since 2010 (as reported in (11)). China, Indonesia, Vietnam, Malaysia, South Africa and Algeria all reported substantial decreases (22–58%) in mismanaged waste, while the largest increases (21–98%) were in Russia, Dominican Republic, Haiti, Guatemala, Peru, Turkey and multiple countries in the Middle East and North Africa (MEA) region, including Kuwait, Oman, United Arab Emirates, Syria, Iraq, Iran and Egypt. Because few countries reported disposal methods in 2010 (12), the 2010 analysis used a logistic regression model to estimate the proportion of inadequately managed waste based upon geographic region and economic status. Countries in the MEA region deviated from the predicted inverse relationship between income and proportion of inadequately managed waste; thus, it is not surprising that many of the countries in which substantial changes were reported since 2010 are in this region.

The top five generators of mismanaged plastic waste in the 2010 analysis (ranked by mass generated by coastal population) – China, Indonesia, Philippines, Vietnam and Thailand – all reported improved waste management in 2016, by 51%, 22%, 9%, 24% and 13%, respectively. Six of 14 high-income EU-28 countries with 0% inadequately managed waste (not including litter) in the 2010 analysis reported small contributions (1-3%) in the 2016 categories “Other” and “Unaccounted for”, while Italy reported 11%. The U.S. reported 0% inadequately managed waste in 2010 and 2016.

According to 2016 estimates for total country populations, India was the largest generator of mismanaged plastic waste (20.8 Mt), followed by Russia, Indonesia, China and Thailand (Table S5). Since 2010, India’s plastic waste generation increased due to an increased per capita waste generation rate (+69%) and an increase in the proportion of plastic in the waste stream (+6.5%, based upon income level and geographic region averages because data were not reported), both of which may be associated with industrialization, urbanization and economic growth (42), while India’s proportion of mismanaged waste remained high (79%). China, on the other hand, reported a 60% decrease in waste generation rates and a 51% decrease in inadequate management from an estimated 74% in 2010 to 23% in 2016, with only 8% of waste reported in open dumps. China’s decreased waste generation rate may be due to a change in estimation method from one using urban populations (43) to one incorporating lower rural waste generation rates. The decrease in inadequately managed waste can be explained by rapid development of incineration plants to manage municipal solid waste (44, 45) and possibly also an expansion of controlled landfills (World Bank reported 60% treatment in “unspecified” landfills, which could neither be classified as open dump nor controlled landfill; 18). In southeast Asia, both Philippines and Vietnam reported decreased per capita waste generation rates, reduced percent plastic in the waste stream, and improved waste management since 2010, resulting in a mass of

mismanaged plastic waste generated by the total population of each country in 2016 that is less than that generated only by their coastal populations in 2010.

It must be noted that the informal sector is active in collection and recycling of waste, especially in urban populations in low- and middle-income countries, with more than 15 million people globally working in this sector (18). These activities could not be systematically accounted for in this analysis, but may affect proportions of mismanaged waste reported here. Finally, as demonstrated by the examples above, the accurate estimation of mass of mismanaged plastic waste relies on all four factors: population size, per capita waste generation rate, proportion of plastic in the waste stream, and waste management practices, as well as robust data collection and reporting.

**Table S1.** United States trade partners for “Waste, parings and scrap, of plastics” (Code 3915 in Comtrade database) in 2016 that had greater than 20% inadequately managed waste, and the mass of plastic scrap imported by these countries from the U.S. in tonnes (t).

| <b>2016 Trade partner</b> | <b>Mass of imported plastic scrap (t)</b> | <b>% Inadequately managed waste</b> |
|---------------------------|-------------------------------------------|-------------------------------------|
| China, Hong Kong SAR      | 783,938                                   | 23                                  |
| China                     | 693,447                                   | 23                                  |
| India                     | 91,913                                    | 77                                  |
| Vietnam                   | 66,747                                    | 62                                  |
| Indonesia                 | 34,521                                    | 59                                  |
| Mexico                    | 32,830                                    | 21                                  |
| Other Asia, nes           | 30,521                                    | 23                                  |
| Turkey                    | 6,606                                     | 45                                  |
| Thailand                  | 6,541                                     | 60                                  |
| El Salvador               | 5,341                                     | 22                                  |
| Guatemala                 | 2,859                                     | 75                                  |
| Dominican Republic        | 1,762                                     | 92                                  |
| Pakistan                  | 1,640                                     | 70                                  |
| Bangladesh                | 1,370                                     | 95                                  |
| Philippines               | 872                                       | 72                                  |
| Nigeria                   | 797                                       | 80                                  |
| Honduras                  | 705                                       | 29                                  |
| Peru                      | 346                                       | 56                                  |
| Ecuador                   | 231                                       | 34                                  |
| Nicaragua                 | 88                                        | 90                                  |
| Cayman Islands            | 70                                        | 79                                  |
| Brazil                    | 68                                        | 23                                  |
| United Arab Emirates      | 49                                        | 62                                  |
| Myanmar                   | 41                                        | 100                                 |
| Bolivia                   | 37                                        | 56                                  |
| Romania                   | 34                                        | 31                                  |
| Guyana                    | 32                                        | 53                                  |
| Samoa                     | 28                                        | 33                                  |
| Panama                    | 24                                        | 42                                  |
| Argentina                 | 23                                        | 23                                  |
| Jamaica                   | 21                                        | 36                                  |
| Sri Lanka                 | 20                                        | 85                                  |
| Morocco                   | 19                                        | 54                                  |
| Nepal                     | 18                                        | 88                                  |
| Kuwait                    | 11                                        | 100                                 |
| Jordan                    | 9                                         | 57                                  |
| Mauritania                | 9                                         | 55                                  |
| Yemen                     | 7                                         | 80                                  |
| Suriname                  | 3                                         | 100                                 |
| Lebanon                   | 3                                         | 29                                  |

|                     |     |    |
|---------------------|-----|----|
| Trinidad and Tobago | 3   | 87 |
| Aruba               | 1   | 89 |
| China, Macao SAR    | 1   | 80 |
| Belize              | 1   | 66 |
| Haiti               | < 1 | 90 |

**Table S2.** United States trade partners for “Waste and scrap of paper and paperboard” (Code 4707 in Comtrade database) in 2016 that had greater than 20% inadequately managed waste, and the mass of paper scrap imported by these countries from the U.S. in tonnes (t).

| <b>2016 Trade Partner</b> | <b>Mass of imported paper scrap (t)</b> | <b>% Inadequately managed waste</b> |
|---------------------------|-----------------------------------------|-------------------------------------|
| China                     | 13,189,751                              | 23                                  |
| India                     | 1,561,924                               | 77                                  |
| Mexico                    | 1,496,470                               | 21                                  |
| Indonesia                 | 379,594                                 | 59                                  |
| Thailand                  | 293,769                                 | 60                                  |
| Other Asia, nes           | 255,590                                 | 23                                  |
| Vietnam                   | 120,673                                 | 62                                  |
| El Salvador               | 40,270                                  | 22                                  |
| Ecuador                   | 29,429                                  | 34                                  |
| Pakistan                  | 27,160                                  | 70                                  |
| Philippines               | 25,257                                  | 72                                  |
| Guatemala                 | 22,397                                  | 75                                  |
| Peru                      | 17,954                                  | 56                                  |
| Argentina                 | 16,341                                  | 23                                  |
| Turkey                    | 11,654                                  | 45                                  |
| Trinidad and Tobago       | 8,455                                   | 87                                  |
| China, Hong Kong SAR      | 8,369                                   | 23                                  |
| Dominican Republic        | 8,275                                   | 92                                  |
| Bolivia                   | 7,313                                   | 56                                  |
| Panama                    | 4,696                                   | 42                                  |
| Honduras                  | 3,276                                   | 29                                  |
| Brazil                    | 2,968                                   | 23                                  |
| Egypt                     | 1,901                                   | 88                                  |
| Lebanon                   | 1,469                                   | 29                                  |
| Bangladesh                | 940                                     | 95                                  |
| Suriname                  | 754                                     | 100                                 |
| United Arab Emirates      | 745                                     | 62                                  |
| Nicaragua                 | 468                                     | 90                                  |
| Tunisia                   | 453                                     | 56                                  |
| United Rep. of Tanzania   | 310                                     | 100                                 |
| Morocco                   | 268                                     | 54                                  |
| Paraguay                  | 266                                     | 23                                  |
| Belize                    | 212                                     | 66                                  |
| Botswana                  | 130                                     | 99                                  |
| Iraq                      | 124                                     | 100                                 |
| Kenya                     | 119                                     | 92                                  |
| Jordan                    | 52                                      | 57                                  |
| Congo                     | 34                                      | 74                                  |
| Montenegro                | 21                                      | 95                                  |

**Table S3.** Percent plastic in municipal solid waste computed from average of values reported according to income level and region (18).

|                                 | <b>Income level</b> |              |              |      |
|---------------------------------|---------------------|--------------|--------------|------|
|                                 | High                | Upper-middle | Lower-middle | Low  |
| East Asia and Pacific           | 12.50               | 11.50        | 11.50        | 9.20 |
| Europe and Central Asia         | 12.25               | 11.25        | 11.25        | 8.95 |
| Latin America and the Caribbean | 12.50               | 11.50        | 11.50        | 9.20 |
| Middle East and North Africa    | 12.50               | 11.50        | 11.50        | 9.20 |
| North America                   | 12.50               | 11.50        | 11.50        | 9.20 |
| South Asia                      | 10.50               | 9.50         | 9.50         | 7.20 |
| Sub-Saharan Africa              | 10.80               | 9.80         | 9.80         | 7.50 |

**Table S4.** Categories of debris type in San Jose illegal dumping study (38) with estimated ranges of the minimum and maximum proportion of plastic we assumed for each category.

| <b>Waste category</b>     | <b>Minimum<br/>% plastic</b> | <b>Maximum<br/>% plastic</b> |
|---------------------------|------------------------------|------------------------------|
| Mixed rigid plastics      | 100                          | 100                          |
| Polystyrene               | 100                          | 100                          |
| Child/baby/elderly items  | 13.1                         | 95                           |
| Mattress*                 | 20                           | 75                           |
| Mixed textiles            | 10                           | 75                           |
| Patio/garden/pool         | 25                           | 75                           |
| Furniture                 | 10                           | 50                           |
| RV/mobile home            | 20                           | 50                           |
| Mixed recyclables         | 25.5                         | 25.5                         |
| Appliances†               | 10                           | 25                           |
| Exercise equipment        | 10                           | 25                           |
| Tire‡                     | 11                           | 24                           |
| Car/auto parts            | 5                            | 20                           |
| Electronics§              | 17                           | 17                           |
| Garbage bag               | 13.1                         | 13.1                         |
| Homeless encampment       | 13.1                         | 13.1                         |
| Construction & demolition | 2                            | 7                            |
| Yard trimmings            | 0                            | 0                            |
| Scrap metal               | 0                            | 0                            |
| Wood scraps               | 0                            | 0                            |
| Hazardous waste           | 0                            | 0                            |

\*<https://www.rubbernews.com/article/20180516/NEWS/180519956/bed-in-a-box-mattress-market-expanding>

†<https://www.steel.org/steel-markets/appliances>

‡<https://www.ustires.org/whats-tire-0>

§<https://plastics.americanchemistry.com/Ten-Facts-About-Plastics-from-Electronics/>

||U.S. EPA, 1998. Characterization of Building-Related Construction and Demolition Debris in the United States.



**Table S5.** Number of Solid Waste Incidents (SWIs) and mass of illegally dumped waste (in short tons) collected by refuse crews from three facilities in Columbus, OH between January 7 and April 12, 2019. Data kindly provided by Columbus Refuse Division administrator, Timothy J. Swauger.

| <b>Refuse collection facility</b> | <b># of SWIs</b> | <b>Waste collected<br/>[tons]</b> |
|-----------------------------------|------------------|-----------------------------------|
| Stephen R. Lennon Center          | 146              | 501.82                            |
| Alum Creek                        | 124              | 366.04                            |
| Georgesville Road                 | 120              | 636.85                            |

**Table S6. Countries with the highest mismanaged plastic waste (in Mt) in 2016 calculated for total country population (gray shading).** Calculations used data reported by World Bank (18) for all countries but the United States (bold text), for which a refined estimate for waste generation and percent plastic was used. The United States mismanaged proportion includes upper and lower bound estimates for illegal dumping. Unshaded columns indicate results of 2010 analysis (11). HIC = high income, UMC = upper middle income, LMC = lower middle income, LIC = low income, NR = not reported.

**Table is in a separate Word file.**

**Data S1. Database of values used in the calculation of the mass of plastic waste generation and mismanaged plastic waste.** Data for 217 countries as reported by World Bank (18), with additional estimates for the United States utilizing refined values for solid waste generation rate and percent plastic in solid waste. United States estimates of mismanaged plastic waste include contributions from domestic illegal dumping and inadequate management of plastic waste generated during processing of imported scrap materials from the U.S. in countries with greater than 20% inadequately managed waste (see text for details).

**Data are in a separate Excel file.**

## REFERENCES AND NOTES

1. K. L. Law, Plastics in the marine environment. *Ann. Rev. Mar. Sci.* **9**, 205–229 (2017).
2. M. Wagner, S. Lambert, *Freshwater Microplastics* (Springer International Publishing, 2018).
3. Y. Chae, Y.-J. An, Current research trends on plastic pollution and ecological impacts on the soil ecosystem: A review. *Environ. Pollut.* **240**, 387–395 (2018).
4. M. Bergmann, S. Mützel, S. Primpke, M. B. Tekman, J. Trachsel, G. Gerdt, White and wonderful? Microplastics prevail in snow from the Alps to the Arctic. *Sci. Adv.* **5**, eaax1157 (2019).
5. R. Dris, J. Gasperi, V. Rocher, M. Saad, N. Renault, B. Tassin, Microplastic contamination in an urban area: A case study in Greater Paris. *Environ. Chem.* **12**, 592–599 (2015).
6. S. A. Carr, J. Liu, A. G. Tesoro, Transport and fate of microplastic particles in wastewater treatment plants. *Water Res.* **91**, 174–182 (2016).
7. *Microplastics in drinking-water* (World Health Organization, 2019).
8. P. G. Ryan, A brief history of marine litter research, in *Marine Anthropogenic Litter*, M. Bergmann, L. Gutow, M. Klages, Eds. (Springer Open, 2015), pp. 1–25.
9. ETATS-UNIS. National research council, National Research Council (U.S.). Study Panel on Assessing Potential Ocean Pollutants, National Research Council (U.S.). Ocean Affairs Board, *Assessing Potential Ocean Pollutants: A Report of the Study Panel on Assessing Potential Ocean Pollutants to the Ocean Affairs Board, Commission on Natural Resources, National Research Council* (National Academies, 1975).
10. International Convention for the Prevention of Pollution from Ships (MARPOL), Annex V: Prevention of Pollution by Garbage from Ships (International Maritime Organization, 1988).
11. J. R. Jambeck, R. Geyer, C. Wilcox, T. R. Siegler, M. Perryman, A. Andrady, R. Narayan, K. L. Law, Plastic waste inputs from land into the ocean. *Science* **347**, 768–771 (2015).
12. D. Hoornweg, P. Bhada-Tata, *What a Waste: A Global Review of Solid Waste Management* (World Bank, 2012).
13. *Stemming the Tide: Land-based strategies for a plastic-free ocean* (McKinsey & Company and Ocean Conservancy, 2015).
14. Alliance to End Plastic Waste; <https://endplasticwaste.org>.

15. Bangkok Declaration on Combating Marine Debris in ASEAN Region (ASEAN, 2019); <https://asean.org/storage/2019/06/2.-Bangkok-Declaration-on-Combating-Marine-Debris-in-ASEAN-Region-FINAL.pdf>.
16. A. L. Brooks, S. Wang, J. R. Jambeck, The Chinese import ban and its impact on global plastic waste trade. *Sci. Adv.* **4**, eaat0131 (2018).
17. R. Geyer, J. R. Jambeck, K. L. Law, Production, use, and fate of all plastics ever made. *Sci. Adv.* **3**, e1700782 (2017).
18. S. Kaza, L. Yao, P. Bhada-Tata, F. Van Woerden, *What a Waste 2.0: A Global Snapshot of Solid Waste Management to 2050* (World Bank Group, 2018).
19. U.S. Environmental Protection Agency (EPA), *Advancing Sustainable Materials Management: 2016 and 2017 Tables and Figures* (EPA, 2019).
20. United Nations Comtrade Database; <https://comtrade.un.org/data>.
21. H. Damgacioglu, M. Hornilla, O. Bafail, N. Celik, Recovering value from single stream material recovery facilities—An outbound contamination analysis in Florida. *Waste Manag.* **102**, 804–814 (2020).
22. *ISRI Scrap Specifications Circular* (Institute of Scrap Recycling Industries Inc., 2018).
23. R. Miranda, M. C. Monte, A. Blanco, Analysis of the quality of the recovered paper from commingled collection systems. *Resour. Conserv. Recycl.* **72**, 60–66 (2013).
24. *The Recycling Myth: Malaysia and the Broken Global Recycling System* (Greenpeace Malaysia, 2018).
25. S. Wilson, Here is away, *Resource Recycling News* (2019); <https://resource-recycling.com/recycling/2019/09/09/here-is-away/>.
26. 2015–16 Centralized Study on Availability of Recycling (Moore Recycling Associates Inc., 2016).
27. Report for Sacramento Regional Solid Waste Authority (Eunomia Research & Consulting, 2018).
28. Notice of the General Office of the State Council on Issuance of Reform and Implementation Plan to Enhance Solid Waste Import Management System by Prohibiting the Entry of Foreign Waste (Chinese Government Network, 2017); [www.isri.org/docs/default-source/int'l-trade/170727chinaannouncement-en.pdf](http://www.isri.org/docs/default-source/int'l-trade/170727chinaannouncement-en.pdf).
29. 2016 Pew Research Center's American Trends Panel: Survey questionnaire and topline (Pew Research Center, 2016).

30. M. J. Rogoff, D. E. Ross, The future of recycling in the United States. *Waste Manag. Res.* **34**, 181–183 (2016).
31. C. Staub, Domestic plastics recycling capacity is expanding, *Resource Recycling News* (2020); <https://resource-recycling.com/recycling/2020/02/25/domestic-plastics-recycling-capacity-is-expanding/>.
32. C. Staub, These projects are boosting domestic capacity for recycled paper, *Resource Recycling News* (2019); <https://resource-recycling.com/recycling/2019/08/27/these-projects-are-boosting-domestic-capacity-for-recycled-paper/>.
33. Twenty Questions About Design Behavior for Sustainability (International Expert Panel on Behavioral Science for Design, 2019); [www.nature.com/documents/design\\_behavior\\_for\\_sustainability.pdf](http://www.nature.com/documents/design_behavior_for_sustainability.pdf).
34. Municipal Solid Waste Management in the U.S.: 2010 & 2013 (Environmental Research & Education Foundation, 2016).
35. J. T. Powell, M. R. Chertow, Quantity, components, and value of waste materials landfilled in the United States. *J. Ind. Ecol.* **23**, 466–479 (2019).
36. What a Waste Global Database; <https://datacatalog.worldbank.org/dataset/what-waste-global-database>.
37. U.S. Environmental Protection Agency (EPA), *Illegal Dumping Prevention Guidebook* (EPA, 1998).
38. A. A. Brandt, *Illegal Dumping as an Indicator for Community Social Disorganization and Crime*, thesis, San Jose State University (2017).
39. National Mixed Rigid Plastic Bale Composition Study (The Association of Postconsumer Plastic Recyclers, 2015).
40. 2014 National Postconsumer Non-Bottle Rigid Plastic Recycling Report (Moore Recycling Associates Inc., 2016).
41. Enviro Consulting, *MRF Quality Assessment Study: Material quality assessment of municipal MRFs within the UK* (WRAP, 2009).
42. K. D. Sharma, S. Jain, Overview of municipal solid waste generation, composition, and management in India. *J. Environ. Eng.* **145**, 04018143 (2019).
43. D. Hoornweg, P. Lam, M. Chaudhry, *Waste Management in China: Issues and Recommendations* (World Bank Group, 2005).

44. L. Ji, S. Lu, J. Yang, C. Du, Z. Chen, A. Buekens, J. Yan, Municipal solid waste incineration in China and the issue of acidification: A review. *Waste Manag. Res.* **34**, 280–297 (2016).
45. J.-W. Lu, S. Zhang, J. Hai, M. Lei, Status and perspectives of municipal solid waste incineration in China: A comparison with developed regions. *Waste Manag.* **69**, 170–186 (2017).
